# Supplementary material for: Identification of Differentially Expressed Genes and Long Noncoding RNAs Associated with Parkinson's Disease
Source: PubMed Central journal article supplement (PMC6379850; doi:10.1155/2019/6078251), 2019-02-05
Supplement: 6078251.f1.pdf [file 6078251.f1.pdf]

Supplementary table 1 The significantly enriched GO terms by the DEGs between Parkinson's disease and healthy control

Down regulated DEGs

| Category           | Term                                                                                                    | Count | P-value  |
|--------------------|---------------------------------------------------------------------------------------------------------|-------|----------|
| Biology Process    | GO:0006357~regulation of transcription from RNA polymerase II promoter                                  | 16    | 0.006352 |
|                    | GO:0010604~positive regulation of macromolecule metabolic process                                       | 16    | 0.025268 |
|                    | GO:0031328~positive regulation of cellular biosynthetic process                                         | 15    | 0.008998 |
|                    | GO:0009891~positive regulation of biosynthetic process                                                  | 15    | 0.010142 |
|                    | GO:0010605~negative regulation of macromolecule metabolic process                                       | 15    | 0.015735 |
|                    | GO:0045935~positive regulation of nucleobase, nucleoside, nucleotide and nucleic acid metabolic process | 14    | 0.010089 |
|                    | GO:0051173~positive regulation of nitrogen compound metabolic process                                   | 14    | 0.012878 |
|                    | GO:0010557~positive regulation of macromolecule biosynthetic process                                    | 14    | 0.01448  |
|                    | GO:0045941~positive regulation of transcription                                                         | 13    | 0.011384 |
|                    | GO:0010628~positive regulation of gene expression                                                       | 13    | 0.014126 |
|                    | GO:0046907~intracellular transport                                                                      | 13    | 0.032927 |
|                    | GO:0006955~immune response                                                                              | 13    | 0.045116 |
|                    | GO:0031327~negative regulation of cellular biosynthetic process                                         | 12    | 0.025931 |
|                    | GO:0009890~negative regulation of biosynthetic process                                                  | 12    | 0.02965  |
|                    | GO:0006952~defense response                                                                             | 12    | 0.045693 |
| Cellular Component | GO:0043232~intracellular non-membrane-bounded organelle                                                 | 35    | 0.027486 |
|                    | GO:0043228~non-membrane-bounded organelle                                                               | 35    | 0.027486 |
|                    | GO:0043233~organelle lumen                                                                              | 28    | 0.011802 |
|                    | GO:0031974~membrane-enclosed lumen                                                                      | 28    | 0.015061 |
|                    | GO:0070013~intracellular organelle lumen                                                                | 27    | 0.016207 |
|                    | GO:0005829~cytosol                                                                                      | 20    | 0.047625 |

|                    |                                                            |    |          |
|--------------------|------------------------------------------------------------|----|----------|
|                    | GO:0005730~nucleolus                                       | 14 | 0.015726 |
|                    | GO:0012505~endomembrane system                             | 14 | 0.035623 |
| Molecular Function | GO:0019899~enzyme binding                                  | 12 | 0.022542 |
|                    | GO:0016564~transcription repressor activity                | 9  | 0.018834 |
|                    | GO:0031406~carboxylic acid binding                         | 7  | 0.0042   |
|                    | GO:0005244~voltage-gated ion channel activity              | 7  | 0.017279 |
|                    | GO:0022832~voltage-gated channel activity                  | 7  | 0.017279 |
|                    | GO:0003702~RNA polymerase II transcription factor activity | 7  | 0.044643 |

#### Up regulated DEGs

| Category        | Term                                                                                                    | Count | P-value  |
|-----------------|---------------------------------------------------------------------------------------------------------|-------|----------|
| Biology Process | GO:0010604~positive regulation of macromolecule metabolic process                                       | 26    | 2.17E-05 |
|                 | GO:0007242~intracellular signaling cascade                                                              | 24    | 0.021454 |
|                 | GO:0042127~regulation of cell proliferation                                                             | 21    | 9.18E-04 |
|                 | GO:0009611~response to wounding                                                                         | 18    | 1.66E-04 |
|                 | GO:0031328~positive regulation of cellular biosynthetic process                                         | 18    | 0.002876 |
|                 | GO:0009891~positive regulation of biosynthetic process                                                  | 18    | 0.003334 |
|                 | GO:0045935~positive regulation of nucleobase, nucleoside, nucleotide and nucleic acid metabolic process | 17    | 0.002772 |
|                 | GO:0051173~positive regulation of nitrogen compound metabolic process                                   | 17    | 0.003774 |
|                 | GO:0010557~positive regulation of macromolecule biosynthetic process                                    | 17    | 0.004378 |
|                 | GO:0008283~cell proliferation                                                                           | 16    | 1.93E-04 |

|                    |                                             |    |          |
|--------------------|---------------------------------------------|----|----------|
|                    | GO:0007267~cell-cell signaling              | 16 | 0.004731 |
|                    | GO:0010033~response to organic substance    | 16 | 0.022649 |
| Cellular Component | GO:0044459~plasma membrane part             | 43 | 3.04E-04 |
|                    | GO:0005576~extracellular region             | 35 | 0.009396 |
|                    | GO:0044421~extracellular region part        | 26 | 7.28E-05 |
|                    | GO:0005887~integral to plasma membrane      | 25 | 0.00376  |
|                    | GO:0031226~intrinsic to plasma membrane     | 25 | 0.004988 |
|                    | GO:0005856~cytoskeleton                     | 25 | 0.022075 |
|                    | GO:0005615~extracellular space              | 20 | 2.68E-04 |
|                    | GO:0044430~cytoskeletal part                | 19 | 0.022159 |
|                    | GO:0030054~cell junction                    | 13 | 0.014823 |
|                    | GO:0015630~microtubule cytoskeleton         | 12 | 0.047853 |
|                    | GO:0045202~synapse                          | 10 | 0.019844 |
| Molecular Function | GO:0030528~transcription regulator activity | 27 | 0.016292 |
|                    | GO:0003700~transcription factor activity    | 21 | 0.00589  |
|                    | GO:0043565~sequence-specific DNA binding    | 16 | 0.003223 |
|                    | GO:0046983~protein dimerization activity    | 14 | 0.007661 |
|                    | GO:0019899~enzyme binding                   | 13 | 0.014207 |
|                    | GO:0016563~transcription activator activity | 10 | 0.040439 |

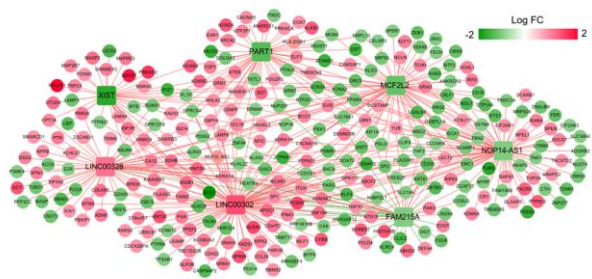

Fig S1

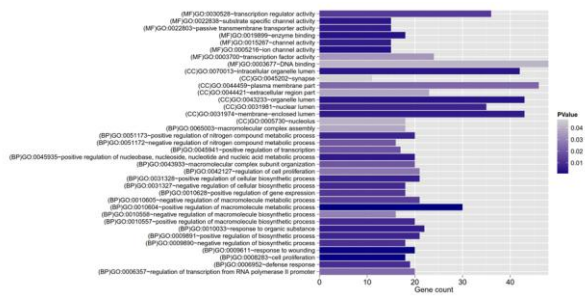

Fig S2

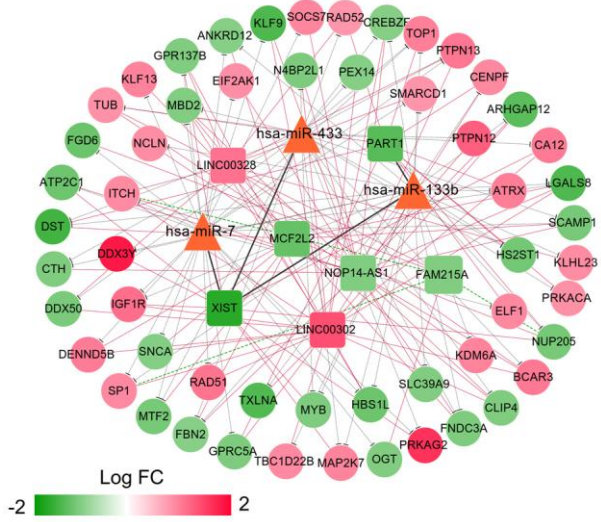

Fig S3
